# Supplementary material for: Different role of circulating myeloid-derived suppressor cells in patients with multiple myeloma undergoing autologous stem cell transplantation
Source: PubMed Central journal article supplement (PMC6367772; doi:10.1186/s40425-018-0491-y), 2019-02-07

**Figure S4a**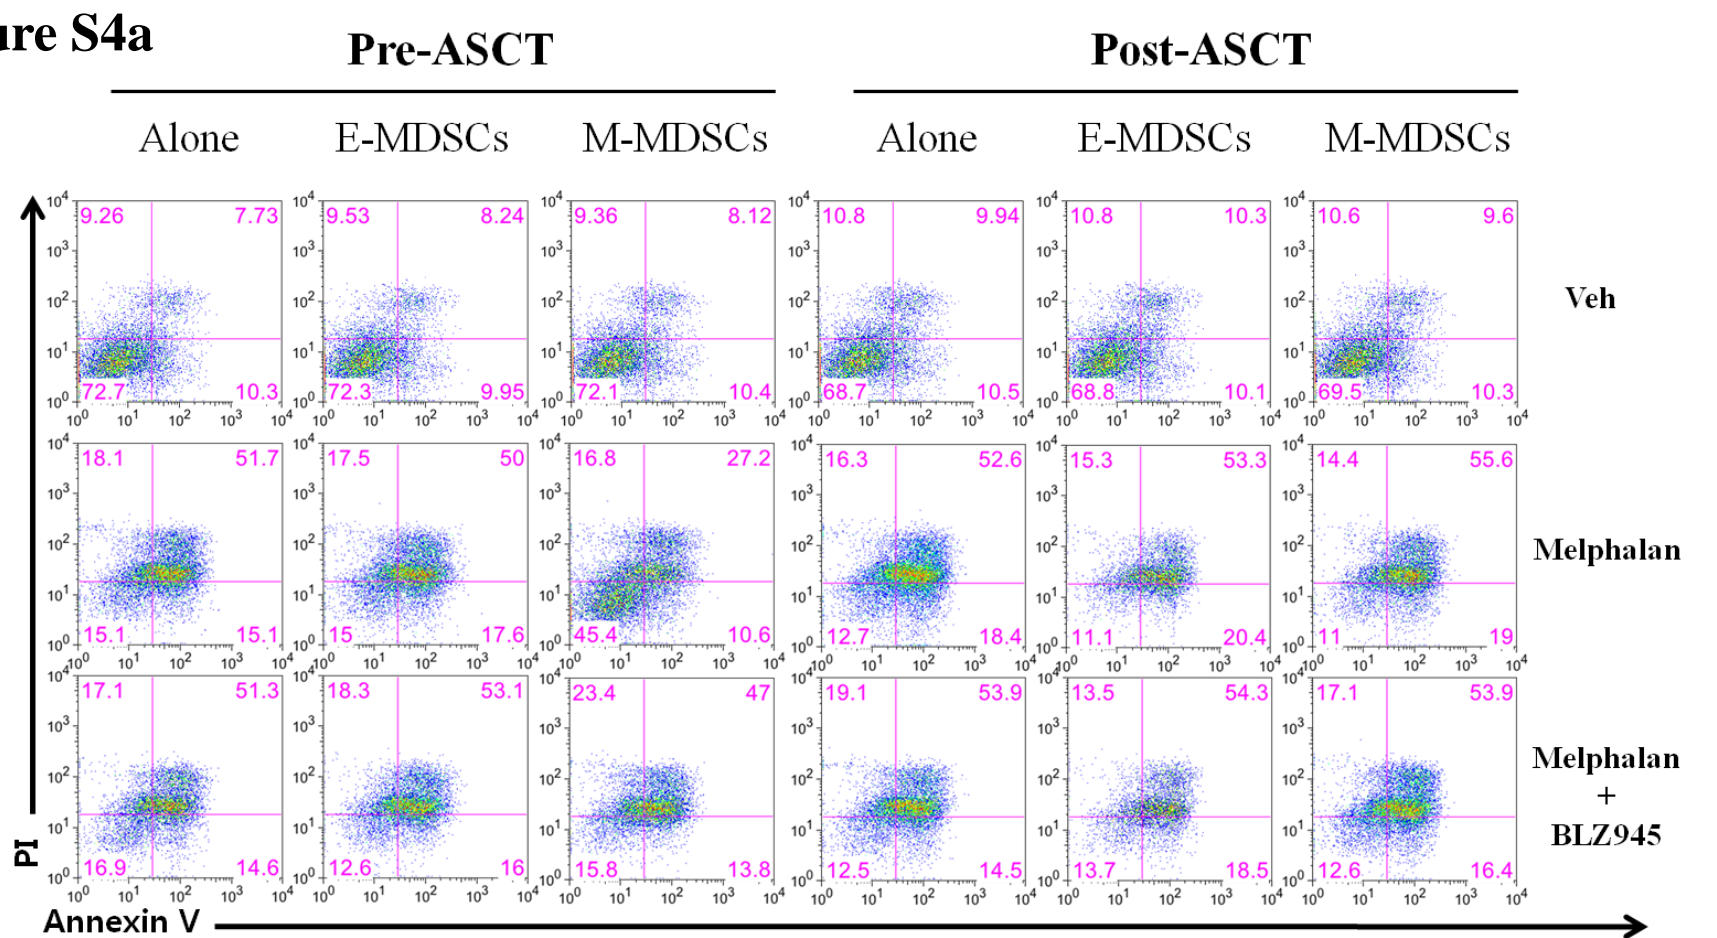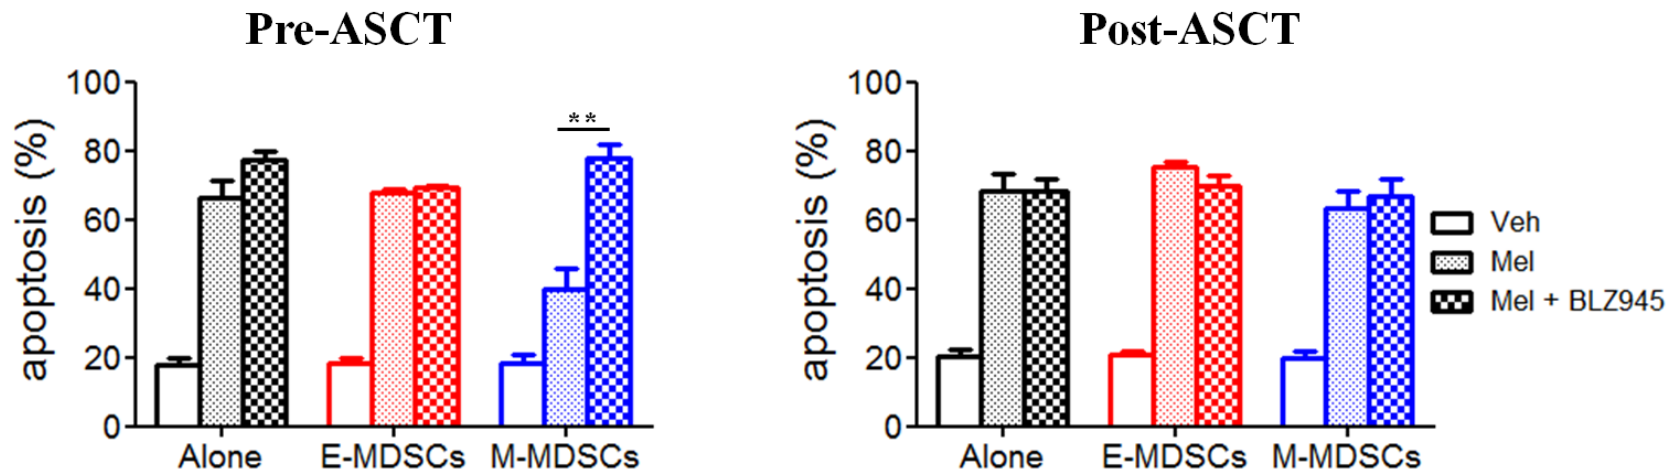

**Figure S4b**

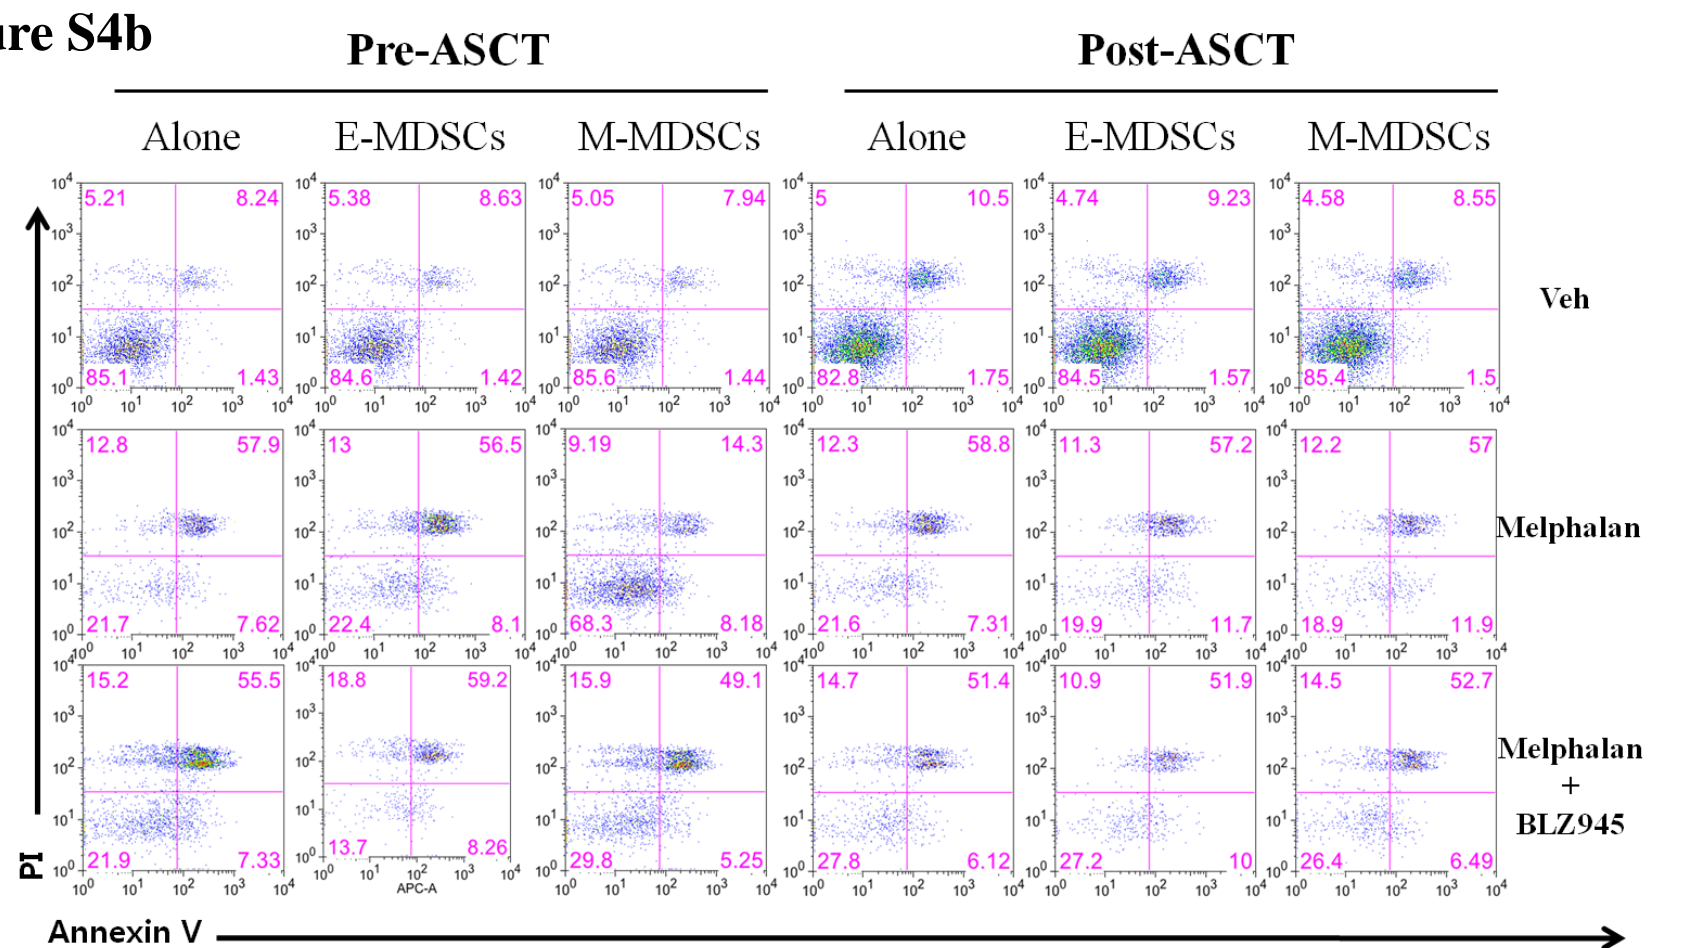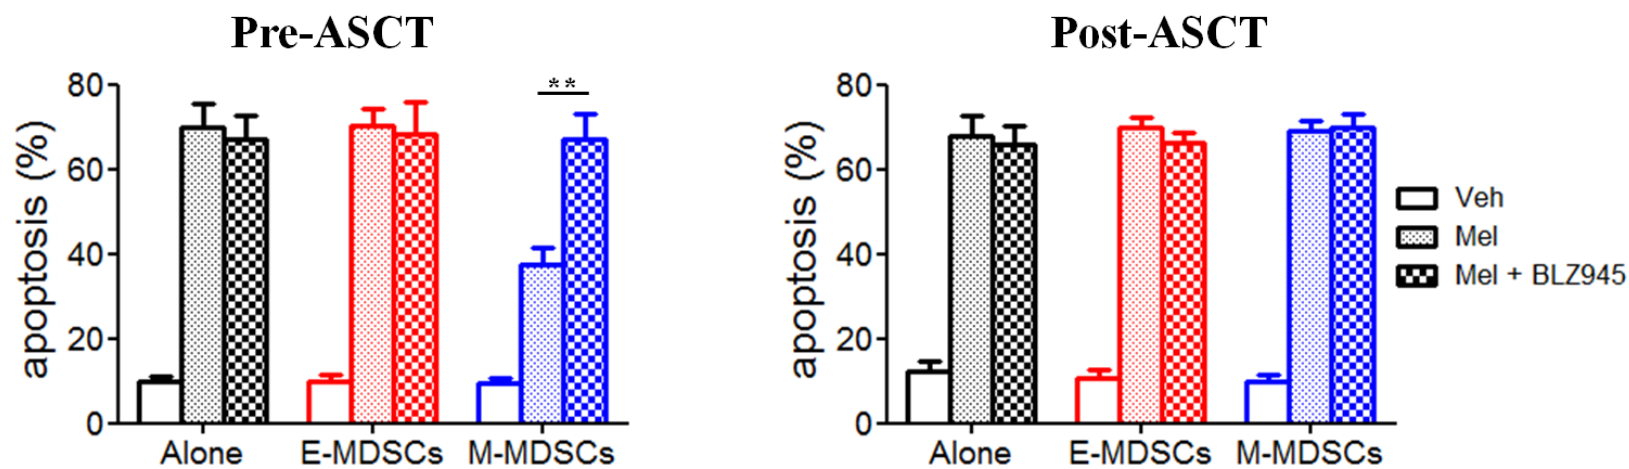

Supplement: 40425_2018_491_MOESM7_ESM.pdf [file 40425_2018_491_MOESM7_ESM.pdf]
